# Supplementary material for: Insights into the Small Molecule Targeting of Biologically Relevant G-Quadruplexes: An Overview of NMR and Crystal Structures
Source: MDPI journal article supplement (doi:10.3390/pharmaceutics14112361), 2022-11-01
Supplement: s1 [file s1]

## **Supplementary Information**

*to the manuscript:*

### **Insights into the small molecule targeting of biologically relevant G-quadruplexes: an overview of NMR and crystal structures**

Andrea Criscuolo<sup>1</sup>, Ettore Napolitano<sup>1</sup>, Claudia Riccardi<sup>1</sup>, Domenica Musumeci<sup>1,2</sup>, Chiara Platella<sup>1,\*</sup>  
and Daniela Montesarchio<sup>1</sup>

<sup>1</sup>Department of Chemical Sciences, University of Naples Federico II, Via Cintia 21, 80126 Naples, Italy

<sup>2</sup>Institute of Biostructures and Bioimages, CNR, 80134 Naples, Italy

\*Correspondence: chiara.platella@unina.it

| Table S1. Chemical structures of the ligands, and structures of the G-quadruplex/small-molecule ligand complexes solved thus far by NMR and X-ray crystallography. |                                                                                                                                                            |                                                                          |                                                                                       |       |
|--------------------------------------------------------------------------------------------------------------------------------------------------------------------|------------------------------------------------------------------------------------------------------------------------------------------------------------|--------------------------------------------------------------------------|---------------------------------------------------------------------------------------|-------|
| PDB ID                                                                                                                                                             | Ligand features:<br>Name<br>Chemical structure                                                                                                             | G-quadruplex features:<br>Molarity<br>Topology<br>Sequence               | Structure of the G-quadruplex/ligand complex                                          | Refs. |
| Telomeric G-quadruplexes                                                                                                                                           |                                                                                                                                                            |                                                                          |                                                                                       |       |
| Human telomeric unimolecular antiparallel G-quadruplexes                                                                                                           |                                                                                                                                                            |                                                                          |                                                                                       |       |
| 2MCO                                                                                                                                                               | $\Delta\Delta\text{-}[\{\text{Ru}(\text{phen})_2\}_2\text{tpphz}]^{4+}$ 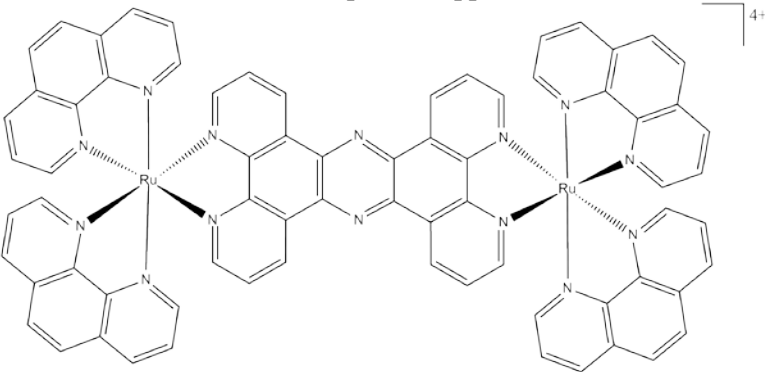  | Unimolecular<br>Antiparallel basket<br>d[AGGG(TTAGGG) <sub>3</sub> ]     |    | [1]   |
| 2MCC                                                                                                                                                               | $\Delta\Delta\text{-}[\{\text{Ru}(\text{phen})_2\}_2\text{tpphz}]^{4+}$  | Unimolecular<br>Antiparallel basket<br>d[AGGG(TTAGGG) <sub>3</sub> ]     |   | [1]   |
| 7OTB                                                                                                                                                               | $\Lambda\text{-}[\text{Ru}(\text{phen})_2(\text{qdppz})]^{2+}$          | Unimolecular<br>Antiparallel chair<br>d[GGG(TTAGGG) <sub>2</sub> TTTGGG] |  | [2]   |
| Human telomeric unimolecular hybrid G-quadruplexes                                                                                                                 |                                                                                                                                                            |                                                                          |                                                                                       |       |
| 6CCW                                                                                                                                                               | Epiberberine                                                            | Unimolecular<br>Hybrid-2<br>d[(TTAGGG) <sub>4</sub> TT]                  |  | [3]   |
| 5MVB                                                                                                                                                               | Auoxo6                                                                  | Unimolecular<br>Hybrid-2<br>d[(TTAGGG) <sub>4</sub> TT]                  |  | [4]   |

|      |                                                                                     |                                                               |                                                                                       |     |
|------|-------------------------------------------------------------------------------------|---------------------------------------------------------------|---------------------------------------------------------------------------------------|-----|
| 6KFJ | 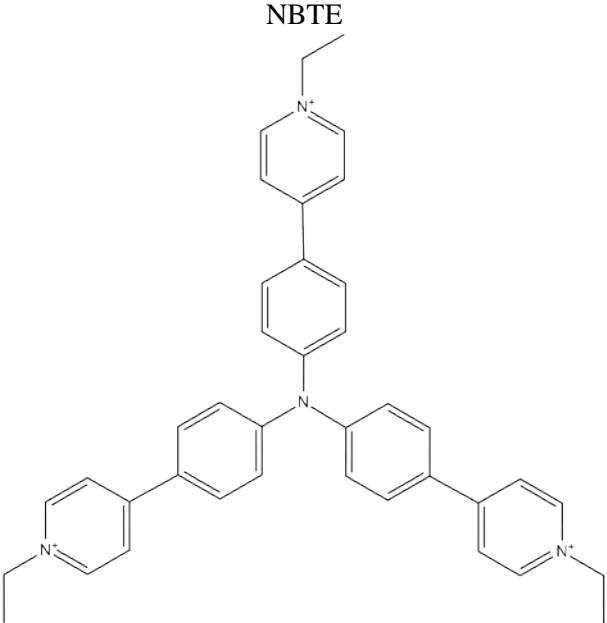   | Unimolecular<br>Hybrid-2<br>d[(TTAGGG) <sub>4</sub> TT]       |    | [5] |
| 6KFI |    | Unimolecular<br>Hybrid-1<br>d[AAAGGG(TTAGGG) <sub>3</sub> AA] |   | [5] |
| 5Z80 |  | Unimolecular<br>Hybrid-1<br>d[AAAGGG(TTAGGG) <sub>3</sub> AA] |  | [6] |
| 5Z8F |  | Unimolecular<br>Hybrid-1<br>d[AAAGGG(TTAGGG) <sub>3</sub> AA] |  | [6] |

|                                                      |                                                                                                                                                     |                                                                                                  |                                                                                       |      |
|------------------------------------------------------|-----------------------------------------------------------------------------------------------------------------------------------------------------|--------------------------------------------------------------------------------------------------|---------------------------------------------------------------------------------------|------|
| 2MB3                                                 | <p>L2H2-6M(2)OTD</p> 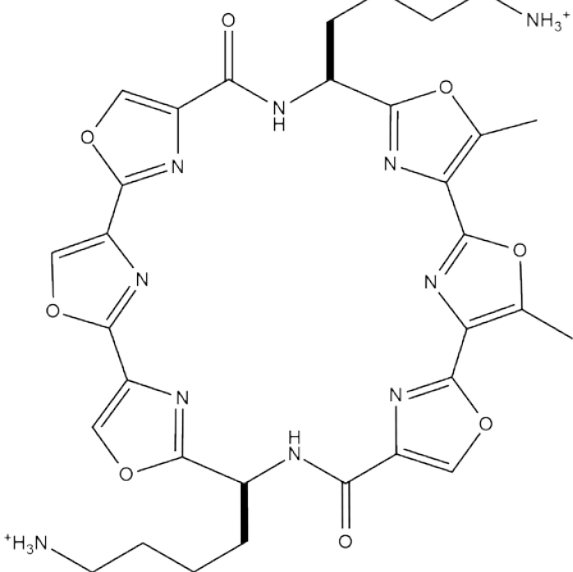                                              | <p>Unimolecular<br/>Hybrid-1<br/>d[TTGGG(TTAGGG)<sub>3</sub>A]</p>                               |    | [7]  |
| 7Z9L                                                 | <p>Phen-DC3</p>                                                   | <p>Unimolecular<br/>From Hybrid-1 to<br/>Antiparallel chair<br/>d[TAGGG(TTAGGG)<sub>3</sub>]</p> |   | [8]  |
| Human telomeric unimolecular parallel G-quadruplexes |                                                                                                                                                     |                                                                                                  |                                                                                       |      |
| 3R6R                                                 | <p>Berberine</p>                                                 | <p>Unimolecular<br/>Parallel<br/>d[TAGGG(TTAGGG)<sub>3</sub>]</p>                                |  | [9]  |
| 5CCW                                                 | <p>[Au(9-methylcafein-8-ylidene)<sub>2</sub>]<sup>+</sup></p>    | <p>Unimolecular<br/>Parallel<br/>d[TAGGG(TTAGGG)<sub>3</sub>]</p>                                |  | [10] |
| 6H5R                                                 | <p>[Au(1-butyl-3-methyl-2-ylidene)<sub>2</sub>]<sup>+</sup></p>  | <p>Unimolecular<br/>Parallel<br/>d[TAGGG(TTAGGG)<sub>3</sub>T]</p>                               |  | [11] |



|      |                                                                                                     |                                                                         |                                                                                       |      |
|------|-----------------------------------------------------------------------------------------------------|-------------------------------------------------------------------------|---------------------------------------------------------------------------------------|------|
| 3CDM | <p>NDI-1</p> 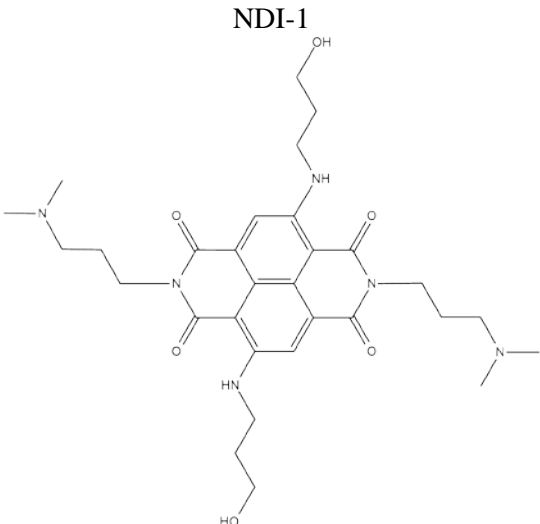      | <p>Unimolecular</p> <p>Parallel</p> <p>d[TAGGG(TTAGGG)<sub>3</sub>]</p> |    | [12] |
| 3SC8 | <p>BMSG-SH3</p>   | <p>Unimolecular</p> <p>Parallel</p> <p>d[AGGG(TTAGGG)<sub>3</sub>]</p>  |   | [13] |
| 3T5E | <p>BMSG-SH4</p>  | <p>Unimolecular</p> <p>Parallel</p> <p>d[AGGG(TTAGGG)<sub>3</sub>]</p>  |  | [13] |
| 3UYH | <p>3d</p>        | <p>Unimolecular</p> <p>Parallel</p> <p>d[AGGG(TTAGGG)<sub>3</sub>]</p>  |  | [14] |
| 4DA3 |                  | <p>Unimolecular</p> <p>Parallel</p> <p>d[GGG(TTAGGG)<sub>3</sub>]</p>   |  | [14] |

|                                                     |                                                                                                                            |                                                                  |                                                                                       |      |
|-----------------------------------------------------|----------------------------------------------------------------------------------------------------------------------------|------------------------------------------------------------------|---------------------------------------------------------------------------------------|------|
| 4DAQ                                                | <p>BMSG-SH3</p> 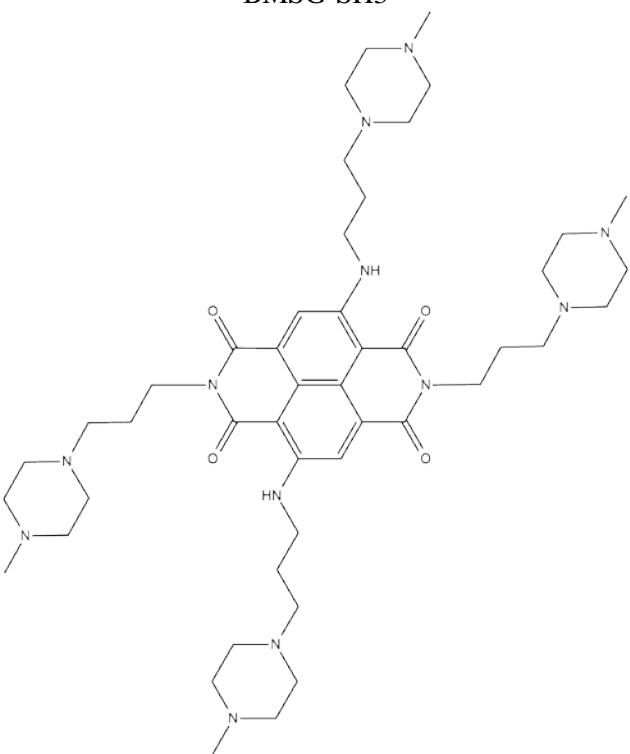                          | <p>Unimolecular<br/>Parallel<br/>d[GGG(TTAGGG)<sub>3</sub>]</p>  |    | [14] |
| 4FXM                                                | <p><i>N</i>-methyl mesoporphyrin IX</p>  | <p>Unimolecular<br/>Parallel<br/>d[AGGG(TTAGGG)<sub>3</sub>]</p> |  | [15] |
| 4G0F                                                |                                         | <p>Unimolecular<br/>Parallel<br/>d[AGGG(TTAGGG)<sub>3</sub>]</p> |  | [15] |
| 6XCL                                                | <p>Pt(II)-based ligand</p>              | <p>Unimolecular<br/>Parallel<br/>d[AGGG(TTAGGG)<sub>3</sub>]</p> |  | [16] |
| Human telomeric bimolecular parallel G-quadruplexes |                                                                                                                            |                                                                  |                                                                                       |      |
| 5CDB                                                | <p>NAX053</p>                           | <p>Bimolecular<br/>Parallel<br/>d(TAGGGTTAGGGT)</p>              |  | [17] |

|      |                                                                                                                     |                                                           |                                                                                       |      |
|------|---------------------------------------------------------------------------------------------------------------------|-----------------------------------------------------------|---------------------------------------------------------------------------------------|------|
| 6S15 | <p>13-alkylpyridine berberine</p> 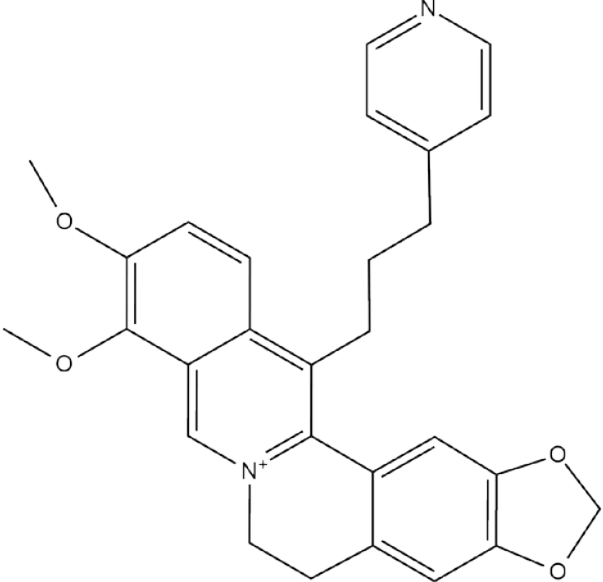 | <p>Bimolecular</p> <p>Parallel</p> <p>d(TAGGGTTAGGGT)</p> |    | [18] |
| 3CCO | <p>NDI-1</p>                      | <p>Bimolecular</p> <p>Parallel</p> <p>d(TAGGGTTAGGGT)</p> |   | [12] |
| 3CE5 | <p>BRACO-19</p>                  | <p>Bimolecular</p> <p>Parallel</p> <p>d(TAGGGTTAGGGT)</p> |  | [19] |
| 2HRI | <p>TMPyP4</p>                    | <p>Bimolecular</p> <p>Parallel</p> <p>d(TAGGGTTAGGG)</p>  |  | [20] |

|                                                        |                                                                                                                         |                                                                             |  |      |
|--------------------------------------------------------|-------------------------------------------------------------------------------------------------------------------------|-----------------------------------------------------------------------------|--|------|
| 3QSC                                                   | <p>Cu(II) salphen metal complex <span style="float: right;">2+</span></p>                                               | <p>Bimolecular<br/>Parallel<br/>d(AGGGT<sup>Br</sup>UAGGTT)</p>             |  | [21] |
| 3QSF                                                   | <p>Ni(II) salphen metal complex <span style="float: right;">2+</span></p>                                               | <p>Bimolecular<br/>Parallel<br/>d(AGGGT<sup>Br</sup>UAGGTT)</p>             |  | [21] |
| Human telomeric tetramolecular parallel G-quadruplexes |                                                                                                                         |                                                                             |  |      |
| 5LS8                                                   | <p><math>\Lambda/\Delta</math>-[Ru(TAP)<sub>2</sub>(11-CN-dppz)]<sup>2+</sup> <span style="float: right;">2+</span></p> | <p>Tetramolecular<br/>From Parallel to<br/>Antiparallel<br/>d(TAGGGTTA)</p> |  | [22] |



|      |                                                                                                                                                       |                                                   |                                                                                       |      |
|------|-------------------------------------------------------------------------------------------------------------------------------------------------------|---------------------------------------------------|---------------------------------------------------------------------------------------|------|
| 6RNL | <p><math>\Delta</math>-[Ru(TAP)<sub>2</sub>(dppz)]<sup>2+</sup></p> 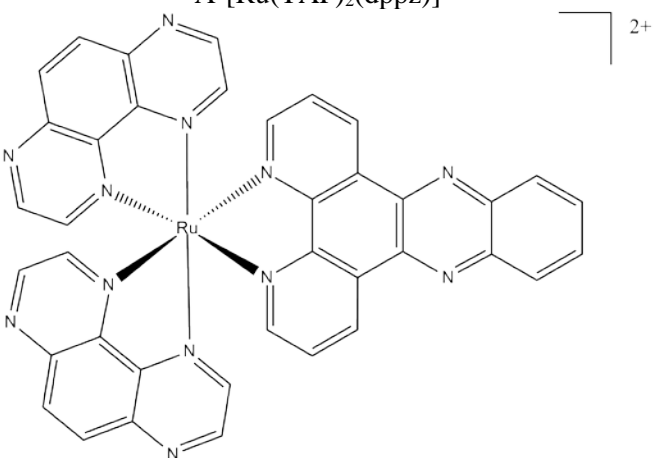 | <p>Tetramolecular<br/>Parallel<br/>d(TAGGGTT)</p> |    | [23] |
| 6KXZ | <p>Epirubicin</p>                                                   | <p>Tetramolecular<br/>Parallel<br/>d(TTAGGGT)</p> |   | [24] |
| 6KN4 | <p>Adriamycin</p>                                                  | <p>Tetramolecular<br/>Parallel<br/>d(TTAGGGT)</p> |  | [25] |
| 2MS6 | <p>Quercetin</p>                                                   | <p>Tetramolecular<br/>Parallel<br/>d(TTAGGGT)</p> |  | [26] |
| 2JWQ | <p>MMQ<sub>1</sub></p>                                             | <p>Tetramolecular<br/>Parallel<br/>d(TTAGGGT)</p> |  | [27] |

|                                                                 |                                                                                                                           |                                                                 |                                                                                       |      |
|-----------------------------------------------------------------|---------------------------------------------------------------------------------------------------------------------------|-----------------------------------------------------------------|---------------------------------------------------------------------------------------|------|
| 1NZM                                                            | <p>RHPS4</p> 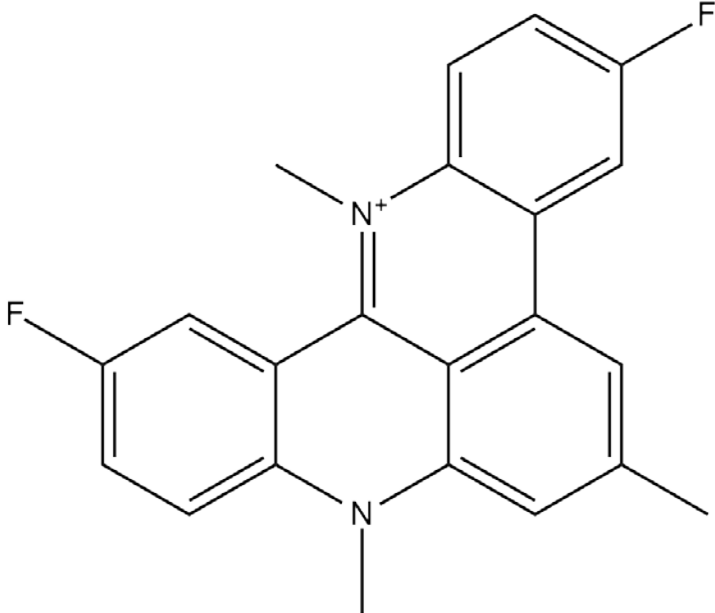                            | <p>Tetramolecular<br/>Parallel<br/>d(TTAGGGT)</p>               |    | [28] |
| <i>Oxytricha telomeric unimolecular parallel G-quadruplexes</i> |                                                                                                                           |                                                                 |                                                                                       |      |
| 6P45                                                            | <p><i>N</i>-methylnesoporphyrin IX</p>  | <p>Unimolecular<br/>Parallel<br/>d[(TGGGT)<sub>4</sub>]</p>     |   | [29] |
| 6PNK                                                            |                                        | <p>Unimolecular<br/>Parallel<br/>d[(GGGTT)<sub>3</sub>GGG]</p>  |  | [29] |
| 6K3X                                                            | <p>d(AG)</p>                           | <p>Unimolecular<br/>Parallel<br/>d[TTGGT(GGGT)<sub>3</sub>]</p> |  | [30] |
| 6K3Y                                                            | <p>cGAMP</p>                           | <p>Unimolecular<br/>Parallel<br/>d[TTGGT(GGGT)<sub>3</sub>]</p> |  | [30] |

| Oxytricha telomeric bimolecular antiparallel G-quadruplexes |                                                                                                                                                                 |                                                |                                                                                       |      |
|-------------------------------------------------------------|-----------------------------------------------------------------------------------------------------------------------------------------------------------------|------------------------------------------------|---------------------------------------------------------------------------------------|------|
| 1L1H                                                        | BSU6039<br>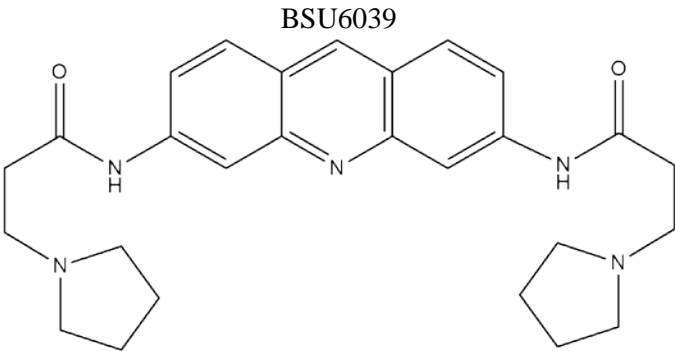                                                                    | Bimolecular<br>Antiparallel<br>d(GGGGTTTTGGGG) |    | [31] |
| 3EM2                                                        | 3-morpholinopropionamido 3,6-disubstituted acridine derivative<br>            | Bimolecular<br>Antiparallel<br>d(GGGGTTTTGGGG) |   | [32] |
| 3EQW                                                        | 3-(2-ethylpiperidino)propionamido 3,6-disubstituted acridine derivative<br>  | Bimolecular<br>Antiparallel<br>d(GGGGTTTTGGGG) |  | [32] |
| 3EUI                                                        |                                                                              | Bimolecular<br>Antiparallel<br>d(GGGGTTTTGGGG) |  | [32] |
| 3ERU                                                        | 3-(2-methylpiperidino)propionamido 3,6-disubstituted acridine derivative<br> | Bimolecular<br>Antiparallel<br>d(GGGGTTTTGGGG) |  | [32] |



|      |                                                                                                                                                                           |                                                         |                                                                                       |      |
|------|---------------------------------------------------------------------------------------------------------------------------------------------------------------------------|---------------------------------------------------------|---------------------------------------------------------------------------------------|------|
| 3ES0 | <p>3-(4-methylpiperidino)propionamido 3,6-disubstituted acridine derivative</p> 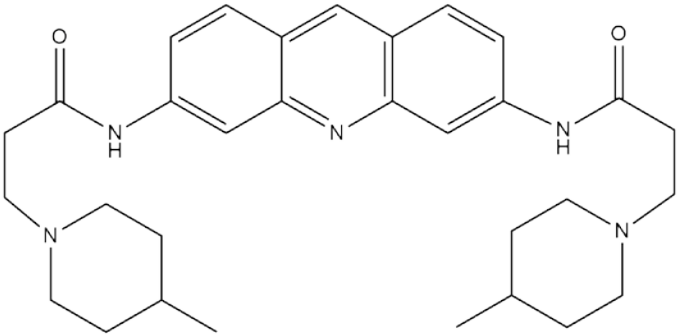         | <p>Bimolecular<br/>Antiparallel<br/>d(GGGGTTTTGGGG)</p> |    | [32] |
| 3ET8 | <p>3-(3-methylpiperidino)propionamido groups 3,6-disubstituted acridine derivative</p>  | <p>Bimolecular<br/>Antiparallel<br/>d(GGGGTTTTGGGG)</p> |   | [32] |
| 3EUM | <p>3-(azepan-1-yl)propionamido 3,6-disubstituted acridine derivative</p>               | <p>Bimolecular<br/>Antiparallel<br/>d(GGGGTTTTGGGG)</p> |  | [32] |
| 3NYP | <p>bis-3-fluoropyrrolidine enantiomer (R,R)</p>                                        | <p>Bimolecular<br/>Antiparallel<br/>d(GGGGTTTTGGGG)</p> |  | [33] |
| 3NZ7 | <p>bis-3-fluoropyrrolidine enantiomer (S,S)</p>                                        | <p>Bimolecular<br/>Antiparallel<br/>d(GGGGTTTTGGGG)</p> |  | [33] |



|                                                                   |                                                                                                                                 |                                                          |                                                                                       |      |
|-------------------------------------------------------------------|---------------------------------------------------------------------------------------------------------------------------------|----------------------------------------------------------|---------------------------------------------------------------------------------------|------|
| 5HIX                                                              | <p>Oligoamide foldamer</p> 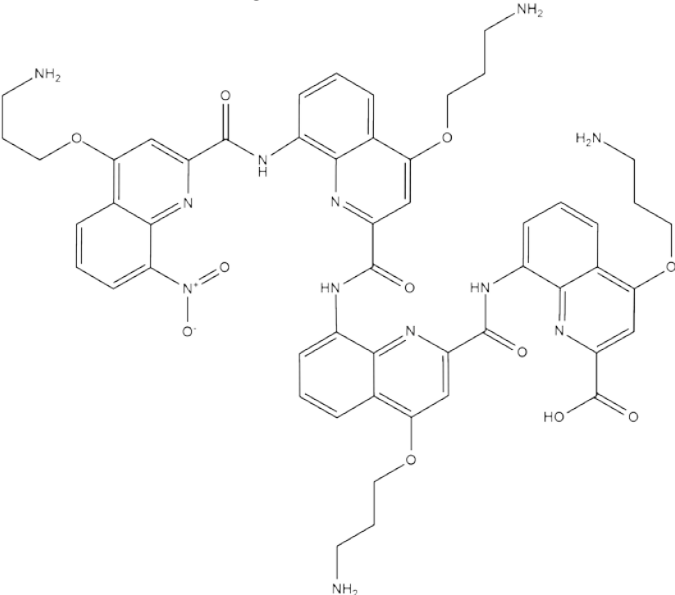                    | <p>Bimolecular<br/>Antiparallel<br/>d(GGGGTTTGTGGGG)</p> |    | [34] |
| <i>Oxytricha</i> telomeric tetramolecular parallel G-quadruplexes |                                                                                                                                 |                                                          |                                                                                       |      |
| 100K                                                              | <p>Daunomycin</p>                            | <p>Tetramolecular<br/>Parallel<br/>d(TGGGGT)</p>         |   | [35] |
| 3TVB                                                              |                                              | <p>Tetramolecular<br/>Parallel<br/>d(GGGG)</p>           |  | [36] |
| 2JT7                                                              | <p>Distamycin</p>                            | <p>Tetramolecular<br/>Parallel<br/>d(TGGGGT)</p>         |  | [37] |
| 2KVY                                                              | <p>N-methyl amide distamycin derivative</p>  | <p>Tetramolecular<br/>Parallel<br/>d(TGGGGT)</p>         |  | [38] |

| RNA telomeric G-quadruplexes           |                                                                                                                                              |                                                          |                                                                                       |      |
|----------------------------------------|----------------------------------------------------------------------------------------------------------------------------------------------|----------------------------------------------------------|---------------------------------------------------------------------------------------|------|
| 3MIJ                                   | Triazole-phenyl-diethylamine 3,6-disubstituted acridine<br>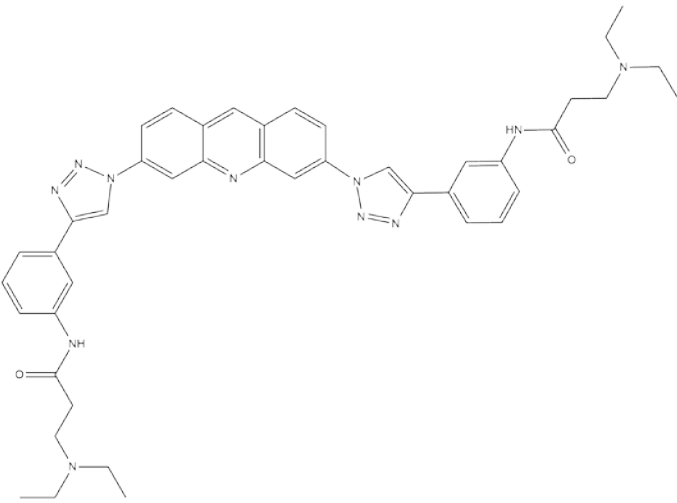 | Bimolecular<br>Parallel<br>r[(UAGGGU) <sub>2</sub> ]     |    | [39] |
| Oncogenic G-quadruplexes               |                                                                                                                                              |                                                          |                                                                                       |      |
| C-MYC oncogene promoter G-quadruplexes |                                                                                                                                              |                                                          |                                                                                       |      |
| 2MGN                                   | Phen-DC3<br>                                               | Unimolecular<br>Parallel<br>d(TGAGGGTGGTGTAGGGTGGGGAAGG) |   | [40] |
| 2A5R                                   | TMPyP4<br>                                                | Unimolecular<br>Parallel<br>d(TGAGGGTGGIGAGGGTGGGGAAGG)  |  | [41] |
| 7N7D                                   | Berberine<br>                                             | Unimolecular<br>Parallel<br>d(TGAGGGTGGGTAGGGTGGGGAA)    |  | [42] |

|      |                                                                                                      |                                                                |                                                                                       |      |
|------|------------------------------------------------------------------------------------------------------|----------------------------------------------------------------|---------------------------------------------------------------------------------------|------|
| 7N7E | <p>Berberine</p> 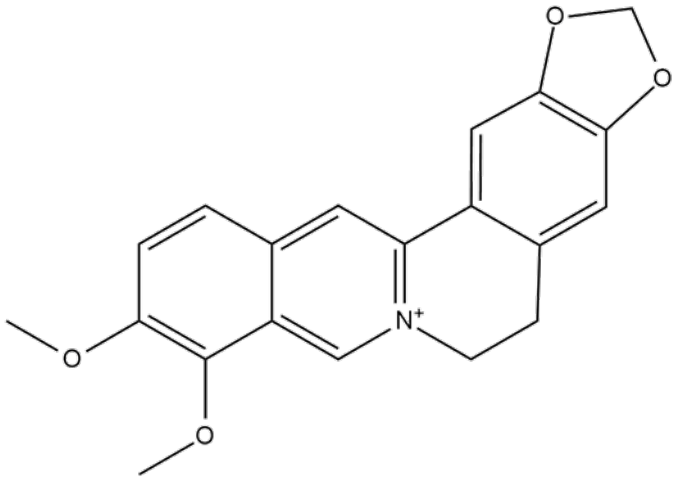   | <p>Unimolecular<br/>Parallel<br/>d(TGAGGGTGGGTAGGGTGGGGAA)</p> |    | [42] |
| 2L7V | <p>Quindoline</p>  | <p>Unimolecular<br/>Parallel<br/>d(TGAGGGTGGGTAGGGTGGGTAA)</p> |   | [43] |
| 7KBW | <p>PEQ</p>        | <p>Unimolecular<br/>Parallel<br/>d(TGAGGGTGGGTAGGGTGGGGAA)</p> |  | [44] |
| 7KBX |                                                                                                      | <p>Unimolecular<br/>Parallel<br/>d(TGAGGGTGGGTAGGGTGGGTAA)</p> |  | [44] |
| 5W77 | <p>DC-34</p>      | <p>Unimolecular<br/>Parallel<br/>d(TGAGGGTGGGTAGGGTGGGTAA)</p> |  | [45] |



|                                          |                                                                                                           |                                                                                  |                                                                                       |      |
|------------------------------------------|-----------------------------------------------------------------------------------------------------------|----------------------------------------------------------------------------------|---------------------------------------------------------------------------------------|------|
| 6JJ0                                     | <div>BMVC</div> 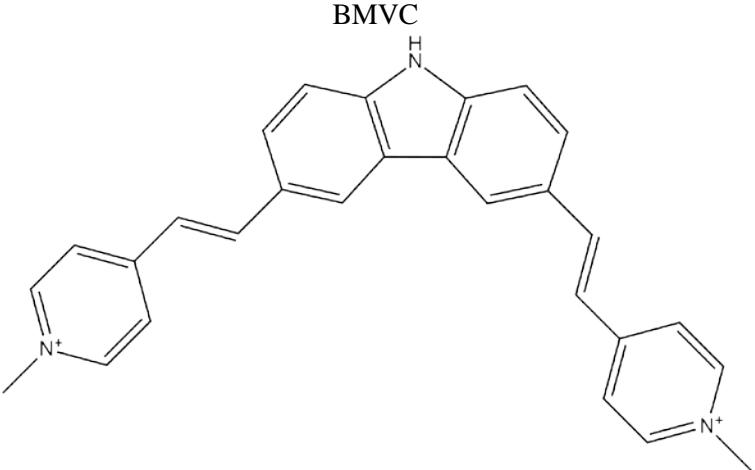         | <div>Unimolecular</div> <div>Parallel</div> <div>d(TGAGGGTGGGTAGGGTGGGTAA)</div> |    | [46] |
| 6O2L                                     |                          | <div>Unimolecular</div> <div>Parallel</div> <div>d(TGAGGGTGGGTAGGGTGGGTAA)</div> |   | [46] |
| 5LIG                                     | <div>DAOTA-M2</div>    | <div>Unimolecular</div> <div>Parallel</div> <div>d(TAGGGAGGGTAGGGAGGGT)</div>    |  | [47] |
| RET oncogene promoter G-quadruplexes     |                                                                                                           |                                                                                  |                                                                                       |      |
| 6JWE                                     | <div>Colchicine</div>  | <div>Unimolecular</div> <div>Parallel</div> <div>d(GGGGCGGGGCGGGGCGGGGT)</div>   |  | [48] |
| 6JWD                                     | <div>Berberine</div>   | <div>Unimolecular</div> <div>Parallel</div> <div>d(GGGGCGGGGCGGGGCGGGGT)</div>   |  | [48] |
| PDGFR-β oncogene promoter G-quadruplexes |                                                                                                           |                                                                                  |                                                                                       |      |



|                                       |                                                                                                             |                                                                |                                                                                       |      |
|---------------------------------------|-------------------------------------------------------------------------------------------------------------|----------------------------------------------------------------|---------------------------------------------------------------------------------------|------|
| 6VOL                                  | <p>dGMP</p> 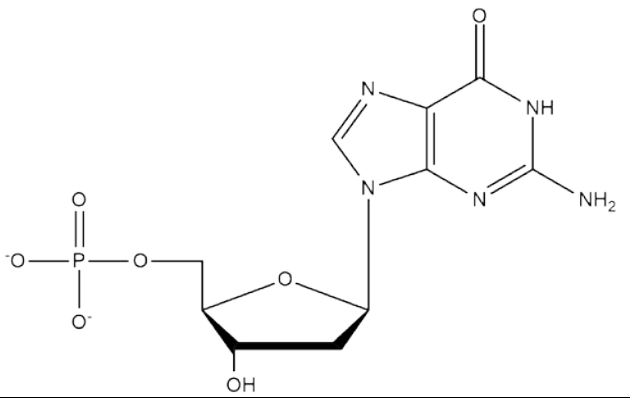               | <p>Unimolecular<br/>Parallel<br/>d(AAGGGAGGGCGGCGGGACA)</p>    |    | [49] |
| 7MSV                                  | <p>dGMP and berberine</p>  | <p>Unimolecular<br/>Parallel<br/>d(AAGGGAGGGCGGCGGGACA)</p>    |    | [50] |
| VEGF oncogene promoter G-quadruplexes |                                                                                                             |                                                                |                                                                                       |      |
| 6LNZ                                  | <p>Pt1 to Pt2</p>        | <p>Unimolecular<br/>Parallel<br/>d(CGCGGCGGGCCTTGGGCGGGGT)</p> |  | [51] |
| Viral G-quadruplexes                  |                                                                                                             |                                                                |                                                                                       |      |
| 6JJI                                  |                          | <p>Bimolecular<br/>Parallel<br/>r(GGCUCGGCGGCGGA)</p>          |  | [52] |
| 6JJH                                  |                                                                                                             | <p>Bimolecular<br/>Parallel<br/>r(GGCUCGGCGGCGGA)</p>          |  | [52] |

## References

- Wilson, T.; Costa, P.J.; Félix, V.; Williamson, M.P.; Thomas, J.A. Structural studies on dinuclear ruthenium(II) complexes that bind diastereoselectively to an antiparallel folded human telomere sequence. *J. Med. Chem.* **2013**, *56*, 8674–8683, doi:10.1021/jm401119b.
- McQuaid, K.T.; Takahashi, S.; Baumgaertner, L.; Cardin, D.J.; Paterson, N.G.; Hall, J.P.; Sugimoto, N.; Cardin, C.J. Ruthenium polypyridyl complex bound to a unimolecular chair-form G-quadruplex. *J. Am. Chem. Soc.* **2022**, *144*, 5956–5964, doi:10.1021/jacs.2c00178.
- Lin, C.; Wu, G.; Wang, K.; Onel, B.; Sakai, S.; Shao, Y.; Yang, D. Molecular recognition of the hybrid-2 human telomeric G-quadruplex by epiberberine: insights into conversion of telomeric G-quadruplex structures. *Angew. Chemie - Int. Ed.* **2018**, *57*, 10888–10893, doi:10.1002/anie.201804667.
- Wirmer-Bartoschek, J.; Bendel, L.E.; Jonker, H.R.A.; Grün, J.T.; Papi, F.; Bazzicalupi, C.; Messori, L.; Gratter, P.; Schwalbe, H. Solution NMR structure of a ligand/hybrid-2-G-quadruplex complex reveals rearrangements that affect ligand binding. *Angew. Chemie - Int. Ed.* **2017**, *56*, 7102–7106, doi:10.1002/anie.201702135.
- Liu, L.Y.; Liu, W.; Wang, K.N.; Zhu, B.C.; Xia, X.Y.; Ji, L.N.; Mao, Z.W. Quantitative detection of G-quadruplex DNA in live cells based on photon counts and complex structure discrimination. *Angew. Chemie - Int. Ed.* **2020**, *59*, 9719–9726, doi:10.1002/anie.202002422.
- Liu, W.; Zhong, Y.-F.; Liu, L.-Y.; Shen, C.-T.; Zeng, W.; Wang, F.; Yang, D.; Mao, Z.-W. Solution structures of multiple G-quadruplex complexes induced by a platinum(II)-based tripod reveal dynamic binding. *Nat. Commun.* **2018**, *9*, 3496–3506, doi:10.1038/s41467-018-05810-4.
- Chung, W.J.; Heddi, B.; Tera, M.; Iida, K.; Nagasawa, K.; Phan, A.T. Solution structure of an intramolecular (3 + 1) human telomeric G-quadruplex bound to a telomestatin derivative. *J. Am. Chem. Soc.* **2013**, *135*, 13495–13501, doi:10.1021/ja405843r.
- Ghosh, A.; Trajkovski, M.; Teulade-Fichou, M.; Gabelica, V.; Plavec, J. Phen-DC 3 induces refolding of human telomeric DNA into a chair-type antiparallel G-quadruplex through ligand intercalation. *Angew. Chemie Int. Ed.* **2022**, doi:10.1002/anie.202207384.
- Bazzicalupi, C.; Ferraroni, M.; Bilia, A.R.; Scheggi, F.; Gratter, P. The crystal structure of human telomeric DNA complexed with berberine: An interesting case of stacked ligand to G-tetrad ratio higher than 1:1. *Nucleic Acids Res.* **2013**, *41*, 632–638, doi:10.1093/nar/gks1001.
- Bazzicalupi, C.; Ferraroni, M.; Papi, F.; Massai, L.; Bertrand, B.; Messori, L.; Gratter, P.; Casini, A. Determinants for tight and selective binding of a medicinal dicarbene gold(I) complex to a telomeric DNA G-quadruplex: a joint ESI MS and XRD investigation. *Angew. Chemie - Int. Ed.* **2016**, *55*, 4256–4259, doi:10.1002/anie.201511999.
- Guarra, F.; Marzo, T.; Ferraroni, M.; Papi, F.; Bazzicalupi, C.; Gratter, P.; Pescitelli, G.; Messori, L.; Biver, T.; Gabbiani, C. Interaction of a gold(I) dicarbene anticancer drug with human telomeric DNA G-quadruplex: solution and computationally aided X-ray diffraction analysis. *Dalt. Trans.* **2018**, *47*, 16132–16138, doi:10.1039/c8dt03607a.
- Parkinson, G.N.; Cuenca, F.; Neidle, S. Topology conservation and loop flexibility in quadruplex-drug recognition: crystal structures of inter- and intramolecular telomeric DNA quadruplex-drug complexes. *J. Mol. Biol.* **2008**, *381*, 1145–1156, doi:10.1016/j.jmb.2008.06.022.
- Collie, G.W.; Promontorio, R.; Hampel, S.M.; Micco, M.; Neidle, S.; Parkinson, G.N. Structural basis for telomeric G-quadruplex targeting by naphthalene diimide ligands. *J. Am. Chem. Soc.* **2012**, *134*, 2723–2731, doi:10.1021/ja2102423.
- Micco, M.; Collie, G.W.; Dale, A.G.; Ohnmacht, S.A.; Pazitna, I.; Gunaratnam, M.; Reszka, A.P.; Neidle, S. Structure-based design and evaluation of naphthalene diimide G-quadruplex ligands as telomere targeting agents in pancreatic cancer cells. *J. Med. Chem.* **2013**, *56*, 2959–2974, doi:10.1021/jm301899y.
- Nicoludis, J.M.; Miller, S.T.; Jeffrey, P.D.; Barrett, S.P.; Rablen, P.R.; Lawton, T.J.; Yatsunyk, L.A. Optimized end-stacking provides specificity of N-methyl mesoporphyrin IX for human telomeric G-quadruplex DNA. *J. Am. Chem. Soc.* **2012**, *134*, 20446–20456, doi:10.1021/ja3088746.
- Miron, C.E.; van Staaldin, L.; Rangaswamy, A.M.; Chen, M.; Liang, Y.; Jia, Z.; Mergny, J.L.; Petitjean, A. Going platinum to the tune of a remarkable guanine quadruplex binder: solution- and solid-state investigations. *Angew. Chemie - Int. Ed.* **2021**, *60*, 2500–2507, doi:10.1002/anie.202012520.
- Ferraroni, M.; Bazzicalupi, C.; Papi, F.; Fiorillo, G.; Guaman-Ortiz, L.M.; Nocentini, A.; Scovassi, A.I.; Lombardi, P.; Gratter, P. Solution and solid-state analysis of binding of 13-substituted berberine analogues to human telomeric G-quadruplexes. *Chem. - An Asian J.* **2016**, *11*, 1107–1115, doi:10.1002/asia.201600116.
- Papi, F.; Bazzicalupi, C.; Ferraroni, M.; Ciolli, G.; Lombardi, P.; Khan, A.Y.; Kumar, G.S.; Gratter, P. Pyridine derivative of the natural alkaloid berberine as human telomeric G4-DNA binder: a solution and solid-state study. *ACS Med. Chem. Lett.* **2020**, *11*, 645–650, doi:10.1021/acsmmedchemlett.9b00516.
- Campbell, N.H.; Parkinson, G.N.; Reszka, A.P.; Neidle, S. Structural basis of DNA quadruplex recognition by an acridine drug. *J. Am. Chem. Soc.* **2008**, *130*, 6722–6724, doi:10.1021/ja8016973.
- Parkinson, G.N.; Ghosh, R.; Neidle, S. Structural basis for binding of porphyrin to human telomeres. *Biochemistry* **2007**, *46*, 2390–2397, doi:10.1021/bi062244n.
- Campbell, N.H.; Karim, N.H.A.; Parkinson, G.N.; Gunaratnam, M.; Petrucci, V.; Todd, A.K.; Vilar, R.; Neidle, S. Molecular basis of structure-activity relationships between salphen metal complexes and human telomeric DNA quadruplexes. *J. Med. Chem.* **2012**, *55*, 209–222, doi:10.1021/jm201140v.
- McQuaid, K.; Abell, H.; Gurung, S.P.; Allan, D.R.; Winter, G.; Sorensen, T.; Cardin, D.J.; Brazier, J.A.; Cardin, C.J.; Hall, J.P. Structural studies reveal enantiospecific recognition of a DNA G-quadruplex by a ruthenium polypyridyl complex. *Angew. Chemie - Int. Ed.* **2019**, *58*, 9881–9885, doi:10.1002/anie.201814502.
- McQuaid, K.; Hall, J.P.; Baumgaertner, L.; Cardin, D.J.; Cardin, C.J. Three thymine/adenine binding modes of the ruthenium complex  $\Lambda$ -[Ru(TAP)2(dppz)]<sup>2+</sup> to the G-quadruplex forming sequence d(TAGGGTT) shown by X-ray crystallography. *Chem. Commun.* **2019**, *55*, 9116–9119, doi:10.1039/c9cc04316k.
- Barthwal, R.; Raje, S.; Pandav, K. Structural basis for stabilization of human telomeric G-quadruplex [d-(TTAGGGT)]<sub>4</sub> by anticancer drug epirubicin. *Bioorganic Med. Chem.* **2020**, *28*, 115761, doi:10.1016/j.bmc.2020.115761.
- Barthwal, R.; Raje, S.; Pandav, K. Structural basis for stabilization of human telomeric G-quadruplex [d-(TTAGGGT)]<sub>4</sub> by anticancer drug adriamycin. *J. Biomol. Struct. Dyn.* **2021**, *39*, 795–815, doi:10.1080/07391102.2020.1730969.
- Tawani, A.; Kumar, A. Structural insight into the interaction of flavonoids with human telomeric sequence. *Sci. Rep.* **2015**, *5*, 1–13, doi:10.1038/srep17574.
- Hounsou, C.; Guittat, L.; Monchaud, D.; Jourdan, M.; Saettel, N.; Mergny, J.L.; Teulade-Fichou, M.P. G-quadruplex recognition by quinacridines: A SAR, NMR, and biological study. *ChemMedChem* **2007**, *2*, 655–666, doi:10.1002/cmde.200600286.
- Gavathiotis, E.; Heald, R.A.; Stevens, M.F.G.; Searle, M.S. Drug recognition and stabilisation of the parallel-stranded DNA quadruplex d(TTAGGGT)<sub>4</sub> containing the human telomeric repeat. *J. Mol. Biol.* **2003**, *334*, 25–36, doi:10.1016/j.jmb.2003.09.018.
- Lin, L.Y.; McCarthy, S.; Powell, B.M.; Manurung, Y.; Xiang, I.M.; Dean, W.L.; Chaires, B.; Yatsunyk, L.A. Biophysical and X-ray structural studies of the (GGGTT)<sub>3</sub>GGG G-quadruplex in complex with N-methyl mesoporphyrin IX. *PLoS One* **2020**, *15*, 1–23, doi:10.1371/journal.pone.0241513.
- Winnerdy, F.R.; Das, P.; Heddi, B.; Phan, A.T. Solution structures of a G-quadruplex bound to linear- and cyclic-dinucleotides. *J. Am. Chem. Soc.* **2019**, *141*, 18038–18047, doi:10.1021/jacs.9b05642.
- Haider, S.M.; Parkinson, G.N.; Neidle, S. Structure of a G-quadruplex-ligand complex. *J. Mol. Biol.* **2003**, *326*, 117–125, doi:10.1016/S0022-2836(02)01354-2.
- Campbell, N.H.; Patel, M.; Tofa, A.B.; Ghosh, R.; Parkinson, G.N.; Neidle, S. Selectivity in ligand recognition of G-quadruplex loops. *Biochemistry* **2009**, *48*, 1675–1680, doi:10.1021/bi802233v.
- Campbell, N.H.; Smith, D.L.; Reszka, A.P.; Neidle, S.; O'Hagan, D. Fluorine in medicinal chemistry:  $\beta$ -fluorination of peripheral pyrrolidines attached to acridine ligands affects their interactions with G-quadruplex DNA. *Org. Biomol. Chem.* **2011**, *9*, 1328–1331, doi:10.1039/c0ob00886a.
- Mandal, P.K.; Baptiste, B.; Langlois d'Estaintot, B.; Kauffmann, B.; Huc, I. Multivalent interactions between an aromatic helical foldamer and a DNA G-quadruplex in the solid state. *ChemBioChem* **2016**, *17*, 1911–1914, doi:10.1002/cbic.201600281.
- Clark, G.R.; Pytel, P.D.; Squire, C.J.; Neidle, S. Structure of the first parallel DNA quadruplex-drug complex. *J. Am. Chem. Soc.* **2003**, *125*, 4066–4067, doi:10.1021/ja0297988.
- Clark, G.R.; Pytel, P.D.; Squire, C.J. The high-resolution crystal structure of a parallel intermolecular DNA G-4 quadruplex/drug complex employing syn glycosyl linkages. *Nucleic Acids Res.* **2012**, *40*, 5731–5738, doi:10.1093/nar/gks193.
- Martino, L.; Virno, A.; Pagano, B.; Virgilio, A.; Di Micco, S.; Galeone, A.; Giancola, C.; Bifulco, G.; Mayol, L.; Randazzo, A. Structural and thermodynamic studies of the interaction of distamycin A with the parallel quadruplex structure [d(TGGGGT)]<sub>4</sub>. *J. Am. Chem. Soc.* **2007**, *129*, 16048–16056, doi:10.1021/ja075710k.
- Cosconati, S.; Marinelli, L.; Trotta, R.; Virno, A.; De Tito, S.; Romagnoli, R.; Pagano, B.; Limongelli, V.; Giancola, C.; Baraldi, P.G.; et al. Structural and

- conformational requisites in DNA quadruplex groove binding: Another piece to the puzzle. *J. Am. Chem. Soc.* **2010**, *132*, 6425–6433, doi:10.1021/ja1003872.
39. Collie, G.W.; Sparapani, S.; Parkinson, G.N.; Neidle, S. Structural basis of telomeric RNA quadruplex-acridine ligand recognition. *J. Am. Chem. Soc.* **2011**, *133*, 2721–2728, doi:10.1021/ja109767y.
  40. Chung, W.J.; Heddi, B.; Hamon, F.; Teulade-Fichou, M.P.; Phan, A.T. Solution structure of a G-quadruplex bound to the bisquinolinium compound phen-DC3. *Angew. Chemie - Int. Ed.* **2014**, *53*, 999–1002, doi:10.1002/anie.201308063.
  41. Phan, A.T.; Kuryavyi, V.; Gaw, H.Y.; Patel, D.J. Small-molecule interaction with a five-guanine-tract G-quadruplex structure from the human myc promoter. *Nat. Chem. Biol.* **2005**, *1*, 167–173, doi:10.1038/nchembio723.
  42. Dickerhoff, J.; Brundridge, N.; McLuckey, S.A.; Yang, D. Berberine molecular recognition of the parallel MYC G-quadruplex in solution. *J. Med. Chem.* **2021**, *64*, 16205–16212, doi:10.1021/acs.jmedchem.1c01508.
  43. Dai, J.; Carver, M.; Hurley, L.H.; Yang, D. Solution structure of a 2:1 quindoline-c-MYC G-quadruplex: Insights into G-quadruplex-interactive small molecule drug design. *J. Am. Chem. Soc.* **2011**, *133*, 17673–17680, doi:10.1021/ja205646q.
  44. Dickerhoff, J.; Dai, J.; Yang, D. Structural recognition of the MYC promoter G-quadruplex by a quinoline derivative: Insights into molecular targeting of parallel G-quadruplexes. *Nucleic Acids Res.* **2021**, *49*, 5905–5915, doi:10.1093/nar/gkab330.
  45. Calabrese, D.R.; Chen, X.; Leon, E.C.; Gaikwad, S.M.; Phyo, Z.; Hewitt, W.M.; Alden, S.; Hilimire, T.A.; He, F.; Michalowski, A.M.; et al. Chemical and structural studies provide a mechanistic basis for recognition of the MYC G-quadruplex. *Nat. Commun.* **2018**, *9*, 1–15, doi:10.1038/s41467-018-06315-w.
  46. Liu, W.; Lin, C.; Wu, G.; Dai, J.; Chang, T.C.; Yang, D. Structures of 1:1 and 2:1 complexes of BMVC and MYC promoter G-quadruplex reveal a mechanism of ligand conformation adjustment for G4-recognition. *Nucleic Acids Res.* **2019**, *47*, 11931–11942, doi:10.1093/nar/gkz1015.
  47. Kotar, A.; Wang, B.; Shivalingam, A.; Gonzalez-Garcia, J.; Vilar, R.; Plavec, J. NMR structure of a triangulenium-based long-lived fluorescence probe bound to a G-quadruplex. *Angew. Chemie - Int. Ed.* **2016**, *55*, 12508–12511, doi:10.1002/anie.201606877.
  48. Wang, F.; Wang, C.; Liu, Y.; Lan, W.; Han, H.; Wang, R.; Huang, S.; Cao, C. Colchicine selective interaction with oncogene: RET G-quadruplex revealed by NMR. *Chem. Commun.* **2020**, *56*, 2099–2102, doi:10.1039/d0cc00221f.
  49. Wang, K.-B.; Dickerhoff, J.; Wu, G.; Yang, D. PDGFR- $\beta$  promoter forms a vacancy G-quadruplex that can be filled in by dGMP: solution structure and molecular recognition of guanine metabolites and drugs. *J. Am. Chem. Soc.* **2020**, *142*, 5204–5211, doi:10.1021/jacs.9b12770.
  50. Wang, K.B.; Dickerhoff, J.; Yang, D. Solution structure of ternary complex of berberine bound to a dGMP-fill-in vacancy G-quadruplex formed in the PDGFR- $\beta$  promoter. *J. Am. Chem. Soc.* **2021**, *143*, 16549–16555, doi:10.1021/jacs.1c06200.
  51. Zhu, B.C.; He, J.; Liu, W.; Xia, X.Y.; Liu, L.Y.; Liang, B.B.; Yao, H.G.; Liu, B.; Ji, L.N.; Mao, Z.W. Selectivity and targeting of G-quadruplex binders activated by adaptive binding and controlled by chemical kinetics. *Angew. Chemie - Int. Ed.* **2021**, *60*, 15340–15343, doi:10.1002/anie.202104624.
  52. Zhang, Y.; El Omari, K.; Duman, R.; Liu, S.; Haider, S.; Wagner, A.; Parkinson, G.N.; Wei, D. Native de novo structural determinations of non-canonical nucleic acid motifs by X-ray crystallography at long wavelengths. *Nucleic Acids Res.* **2020**, *48*, 9886–9898, doi:10.1093/nar/gkaa439.
